# Supplementary material
Source: PubMed Central journal article supplement (PMC6600644)

# Fig3-D

Biological replicates R1, R2, and R3. R3 was used for Fig3-D.

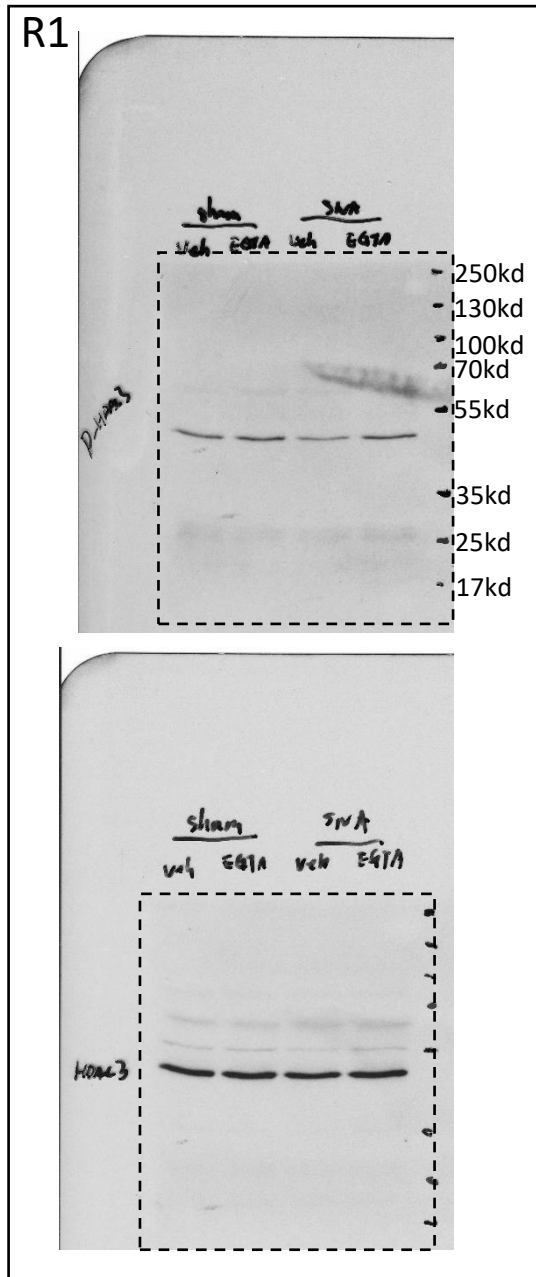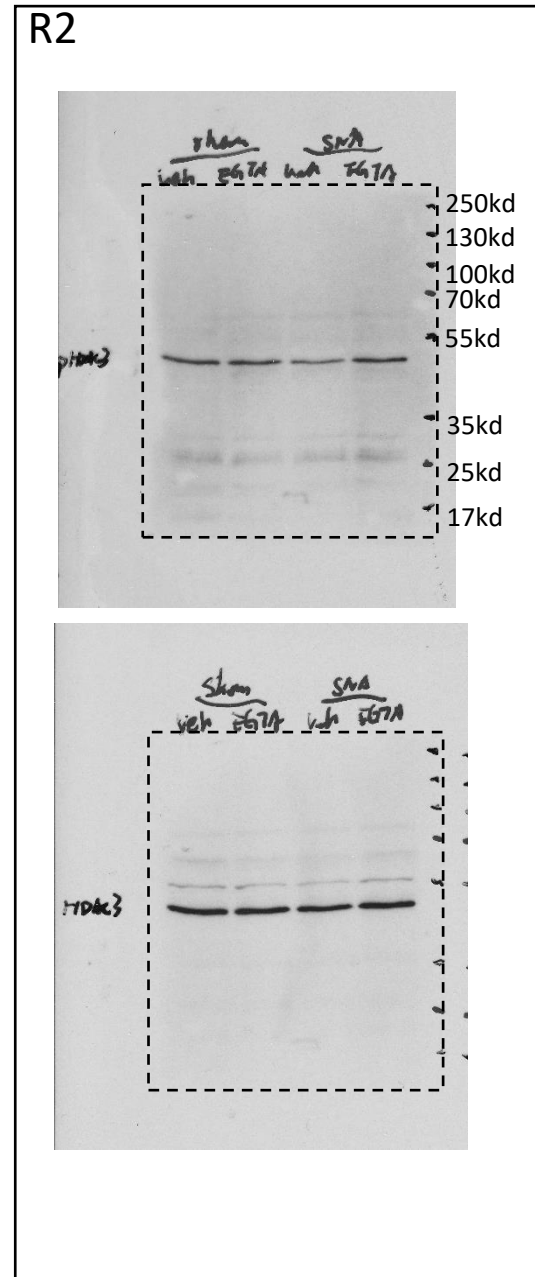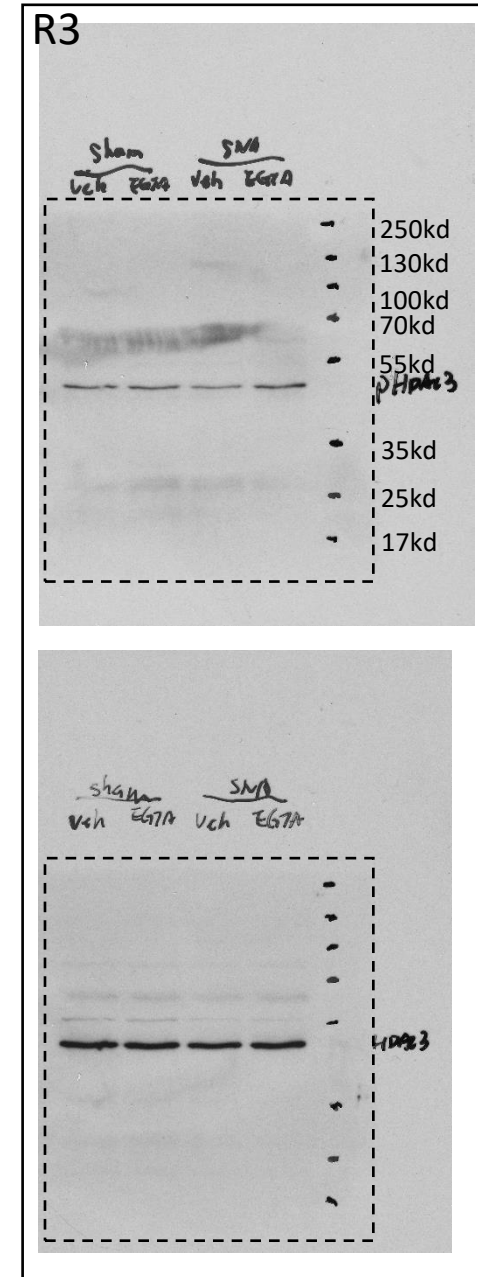

Fig3-D

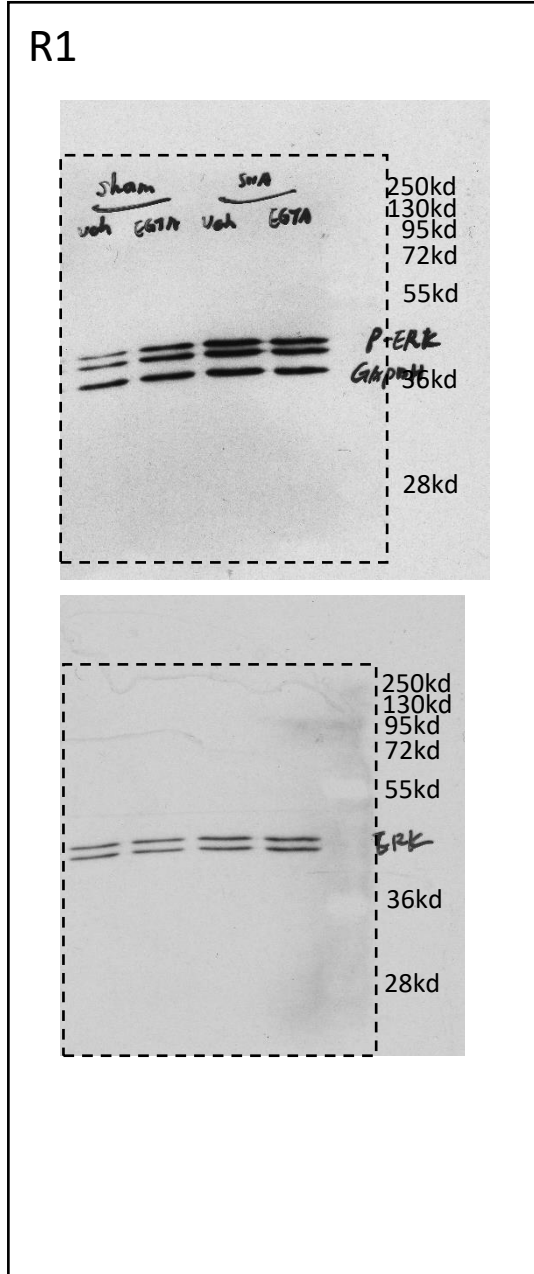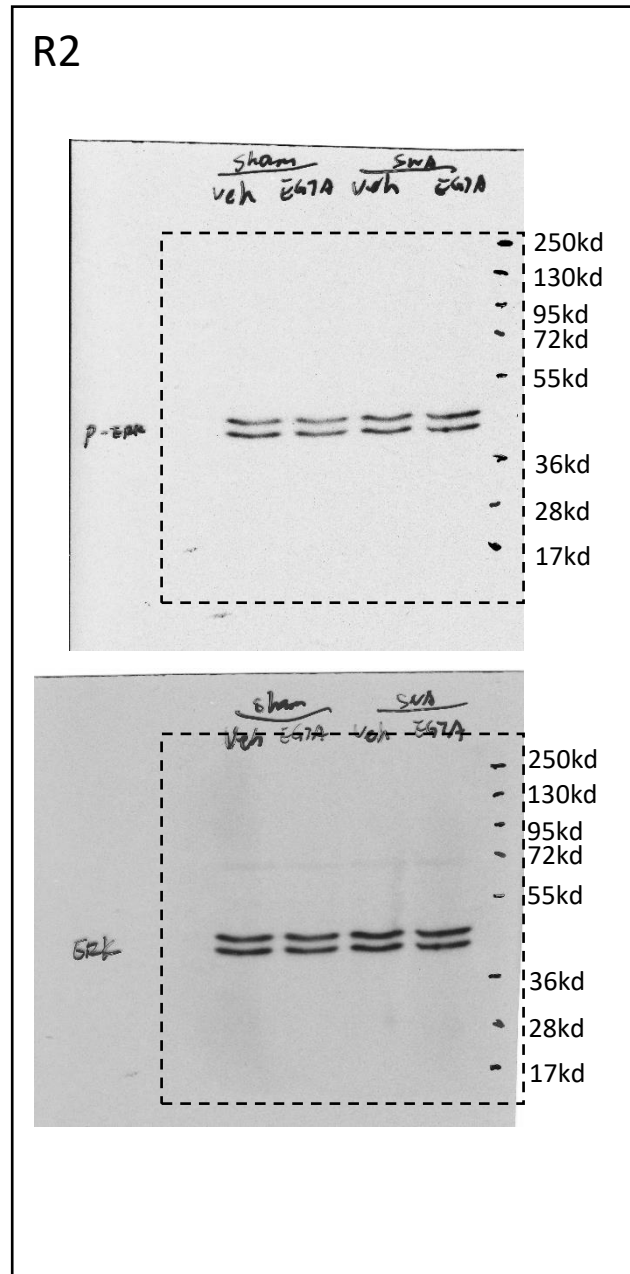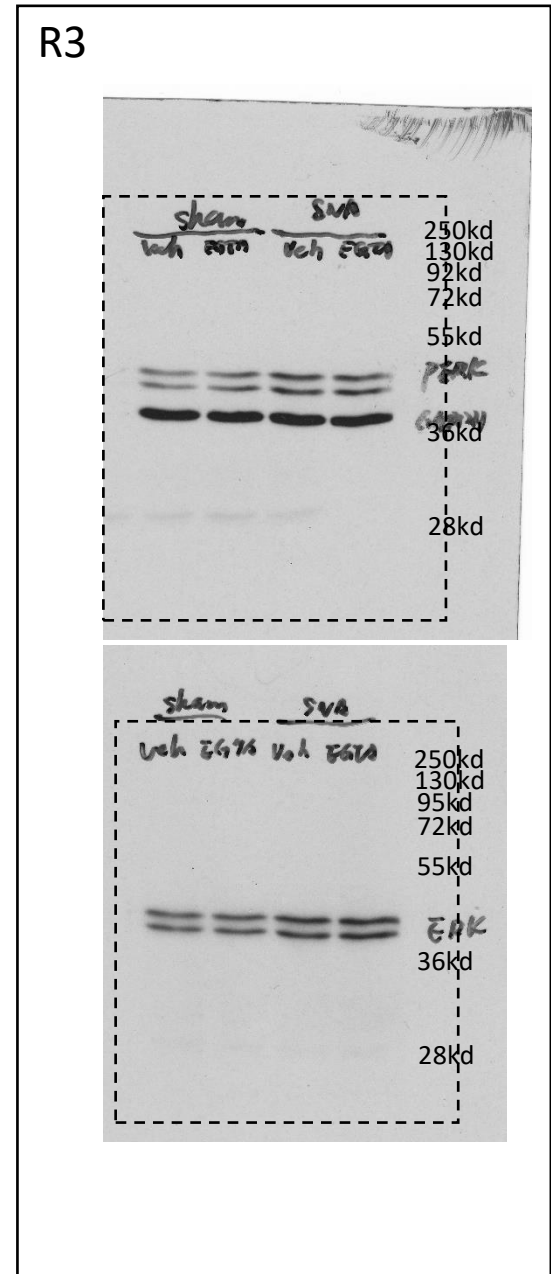

Supplement: EMBJ-38-e101032-s010.pdf [file EMBJ-38-e101032-s010.pdf]
